# Supplementary material
Source: PubMed Central journal article supplement (PMC5263050)
Supplement: NIHMS836856-supplement-1.pdf [file NIHMS836856-supplement-1.pdf]

**Data S1: Mass spectra for *O*-fucose glycoforms of peptides from the 20 EGF repeats containing an *O*-fucose consensus sequence in mouse N1 EGF1-36 (Fig. 1C), related to Figure 3.** Samples were generated in HEK293T cells co-transfected with plasmid encoding EGF1-36 and EV (-Fng) or any of the Fringes (+Lfng, +Mfng or +Rfng)) as described in Experimental Procedures. Upper panels show an MS spectrum at a specific time, with the ion corresponding to the  $m/z$  of the peptide (red triangle above black bar) containing an *O*-fucose consensus sequence indicated. In the absence of any Fringe, this peptide is modified with *O*-fucose monosaccharide (red triangle). In the presence of Fringe samples (+Lfng, +Mfng or +Rfng), the indicated ions in the MS scan correspond to the  $m/z$  for *O*-fucose monosaccharide or Fringe elongated glycoforms of the same peptide from the EGF repeat as in the absence of Fringe. Lower panels show the MS/MS spectra confirming the identity of corresponding glycopeptides based on the presence of peptide-specific b- and/or y-ions. Tables (right) show the  $m/z$  used for the EIC searches for glycoforms of the peptide as in Fig. 2 (unmodified, mono-, di-, tri- and tetra-saccharide glycoforms). Key: black bar, unmodified peptide; red triangle, fucose; blue square, GlcNAc; yellow circle, galactose; purple diamond, sialic acid. Summaries of results are shown in Fig. 4.

# EGF 2

<sup>70</sup>NAGTCHVVDHGGTVDYACSCPL  
GFSGPLCLTPLDNA LANPCR<sup>112</sup>

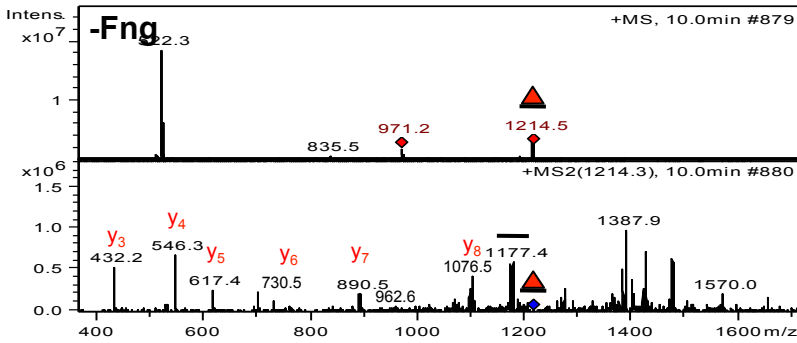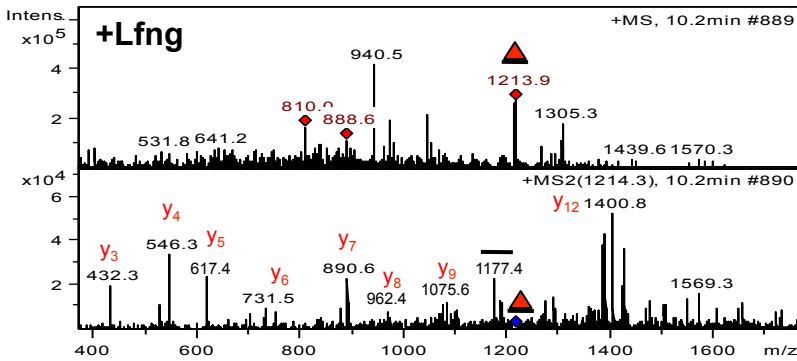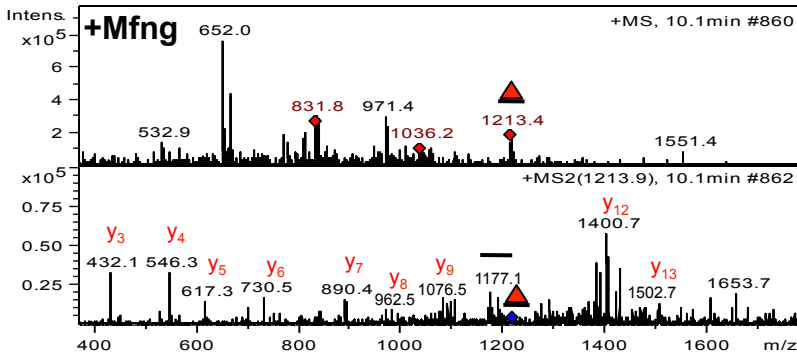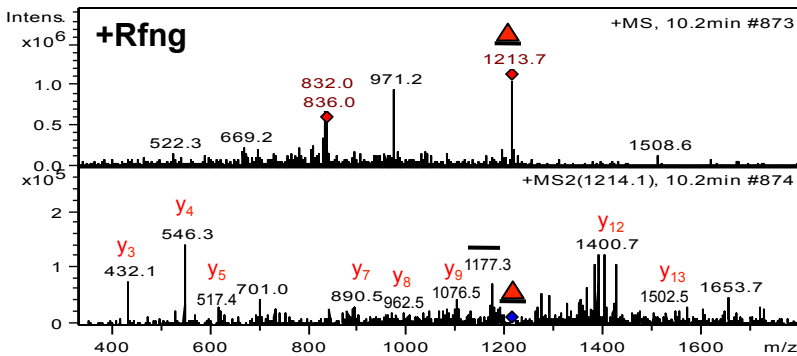

| Glycoform | Predicted Mass (M+4H) <sup>4+</sup> |
|-----------|-------------------------------------|
|           | 1177.4                              |
|           | 1213.9                              |
|           | 1264.7                              |
|           | 1305.2                              |
|           | 1377.7                              |
|           | 1305.2                              |
|           | 1377.7                              |

# EGF 3

$^{113}\text{NNGTCDLLLTLEYK}^{126}$

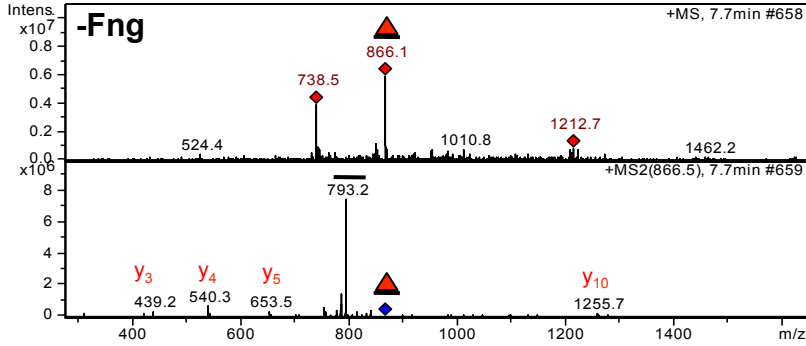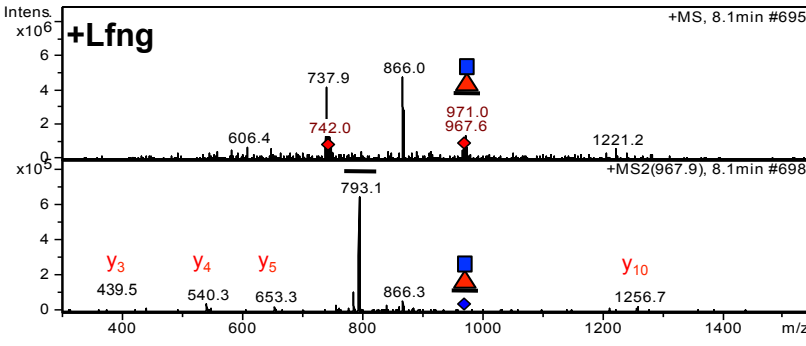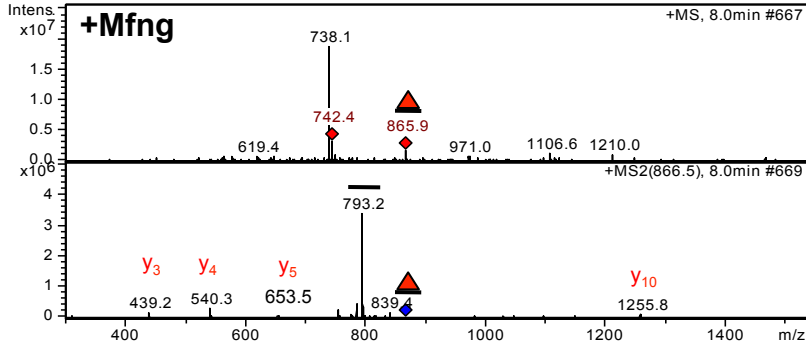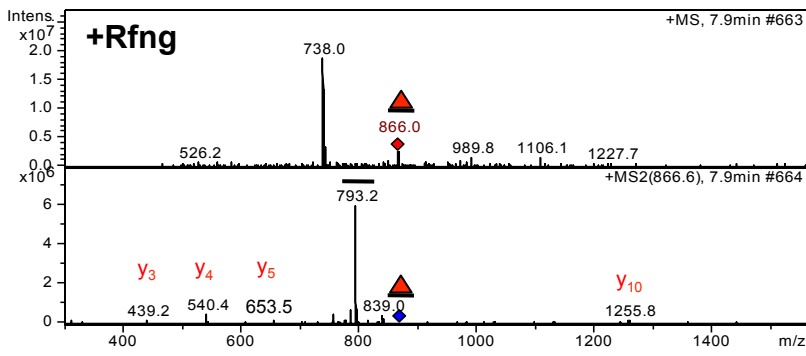

| Glycoform | Predicted Mass (M+2H) <sup>2+</sup> |
|-----------|-------------------------------------|
|           | 793.2                               |
|           | 866.2                               |
|           | 967.7                               |
|           | 1048.7                              |
|           | 1193.7                              |

# EGF 5

182CSQNPGLCRHGGTCHNE198

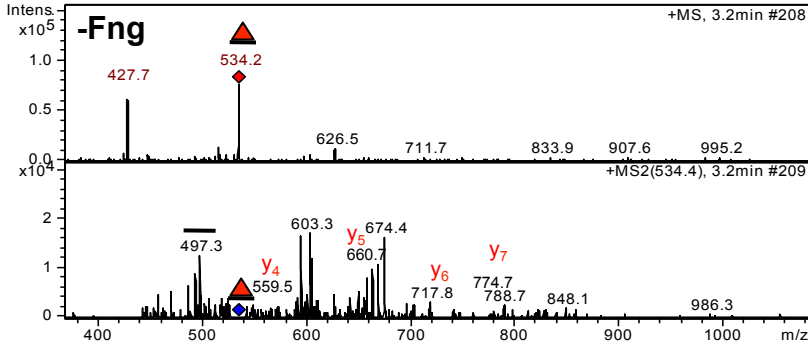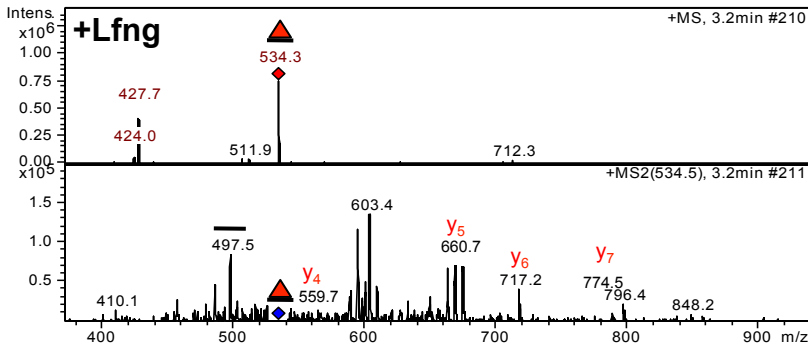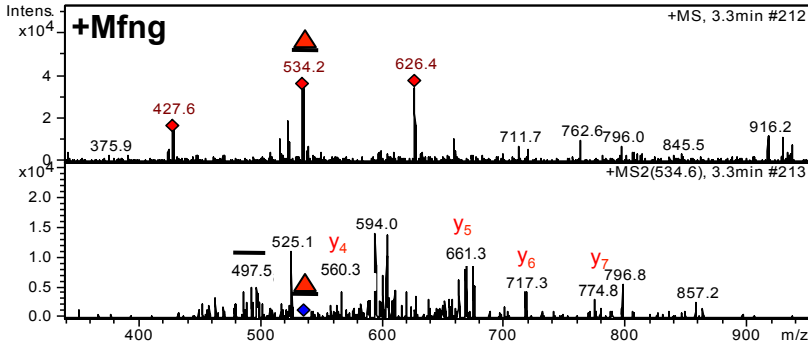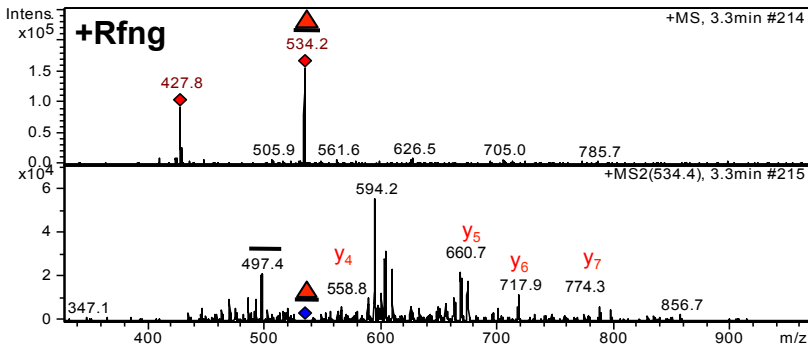

| Glycoform | Predicted Mass (M+4H) <sup>4+</sup> |
|-----------|-------------------------------------|
|           | 497.3                               |
|           | 533.8                               |
|           | 584.6                               |
|           | 625.1                               |
|           | 697.6                               |

# EGF 6

<sup>217</sup>LPYVPCSPSPCQNGGTCRPTGDTT<sup>242</sup>

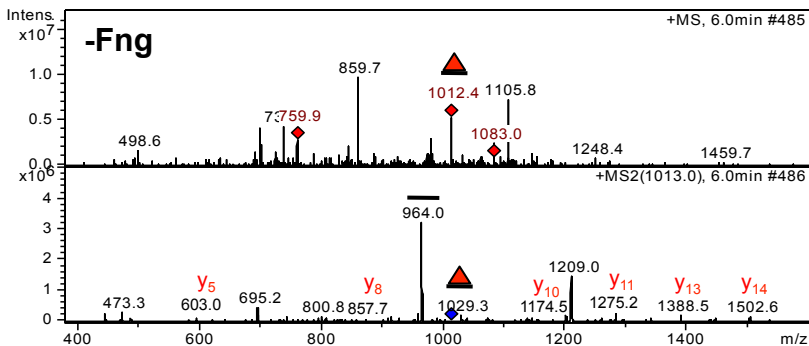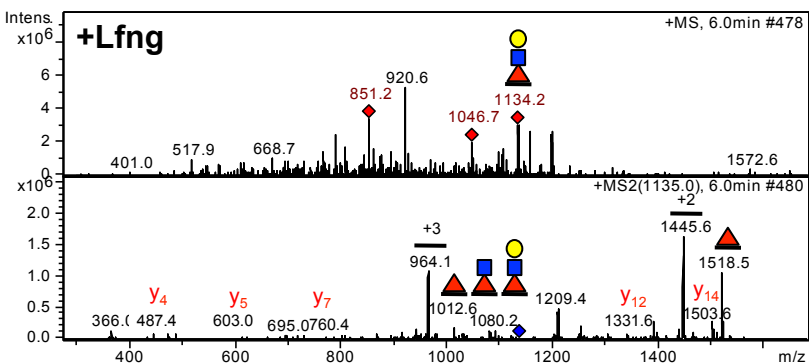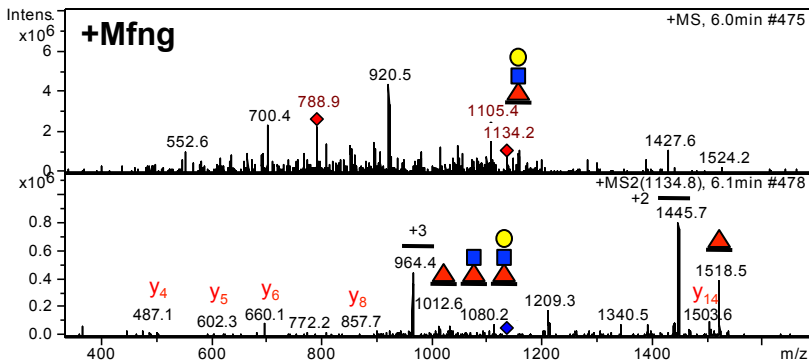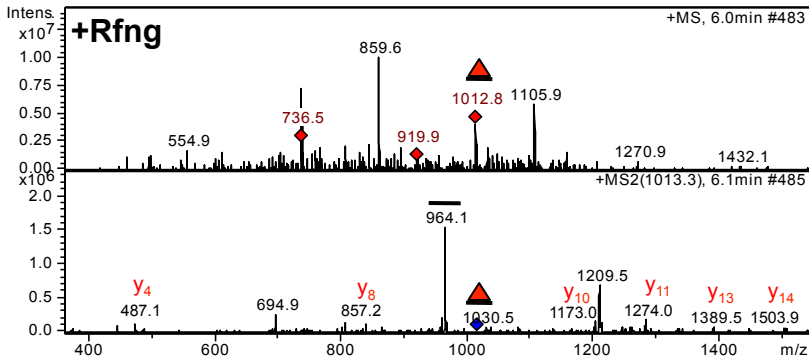

| Glycoform | Predicted Mass (M+3H) <sup>3+</sup> |
|-----------|-------------------------------------|
|           | 964.0                               |
|           | 1012.7                              |
|           | 1080.4                              |
|           | 1134.4                              |
|           | 1231.1                              |

# EGF8

302MPNACQNGG**T**CHNTHGGYNCVCVNGW<sup>327</sup>

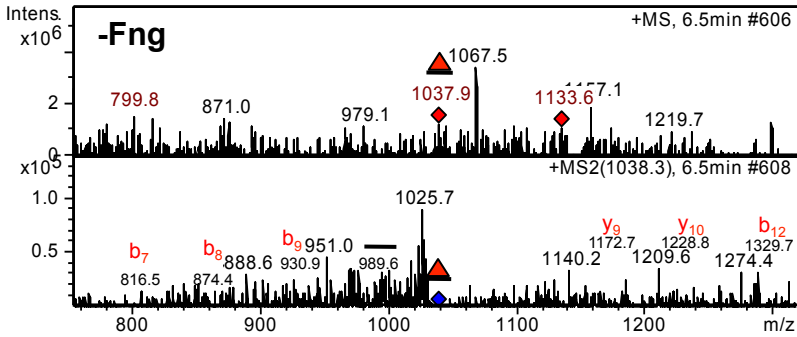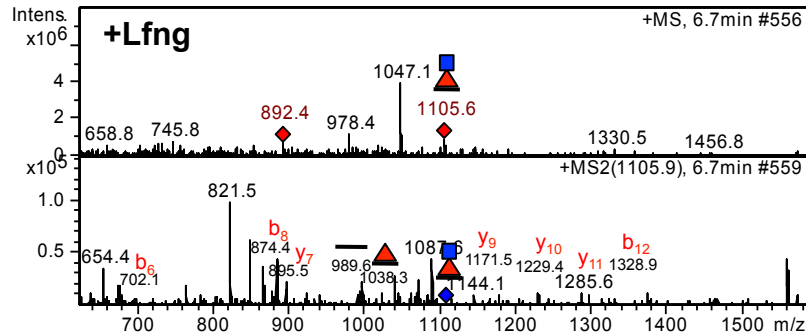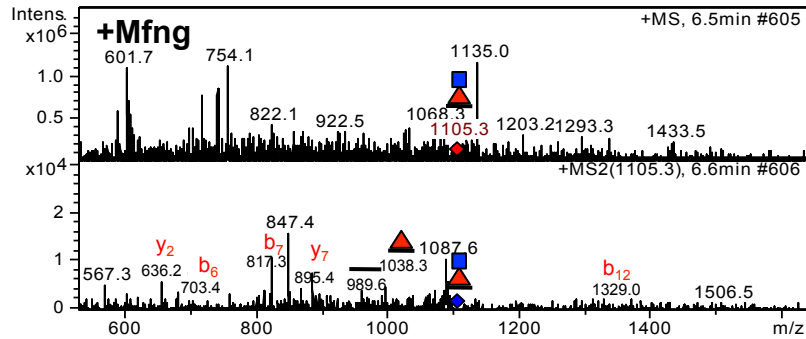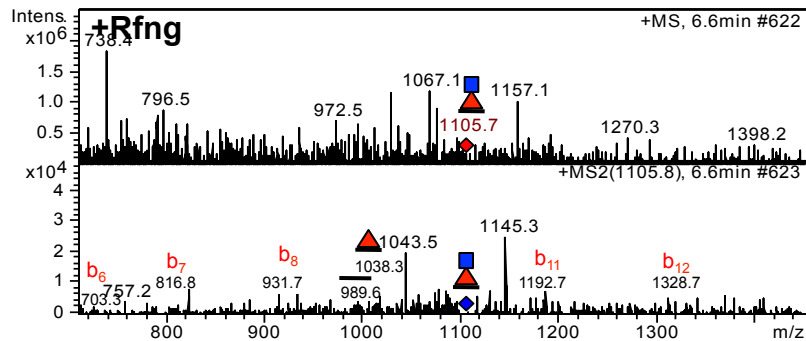

| Glycoform | Predicted Mass (M+3H) <sup>3+</sup> |
|-----------|-------------------------------------|
|           | 989.6                               |
|           | 1038.3                              |
|           | 1106.0                              |
|           | 1160.0                              |
|           | 1257.1                              |

# EGF9

<sup>346</sup>QGATCHDRVASFYCECPHGRTGL<sup>368</sup>

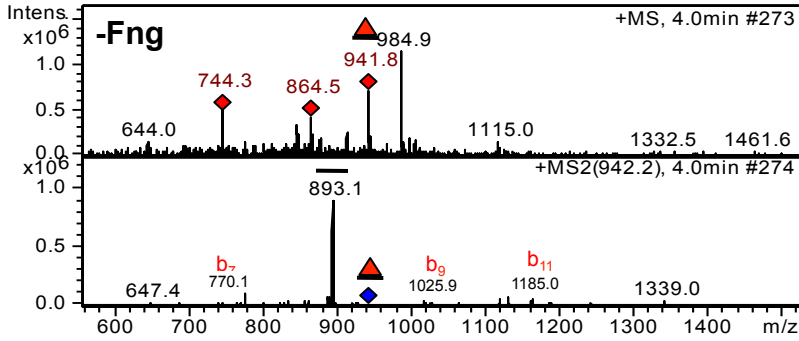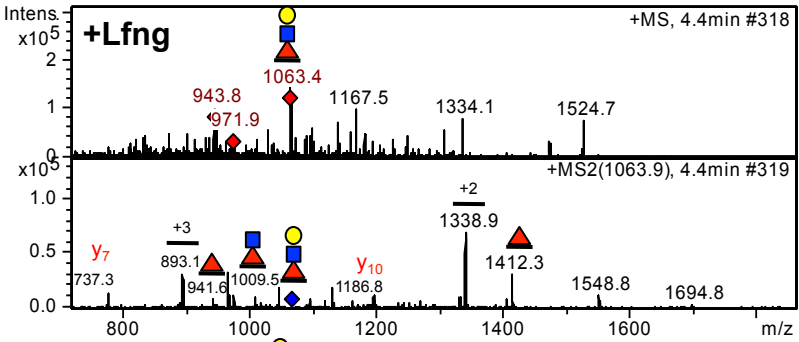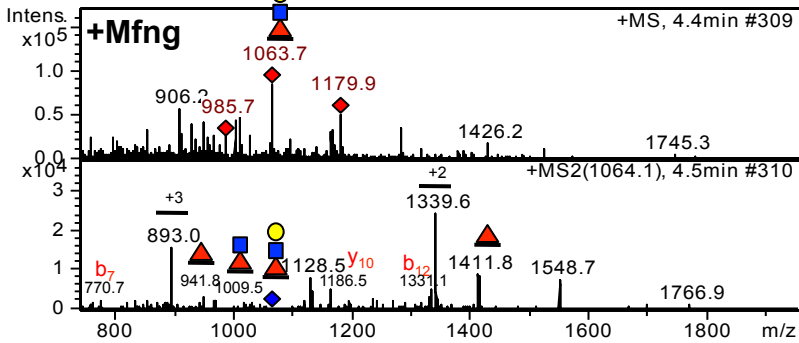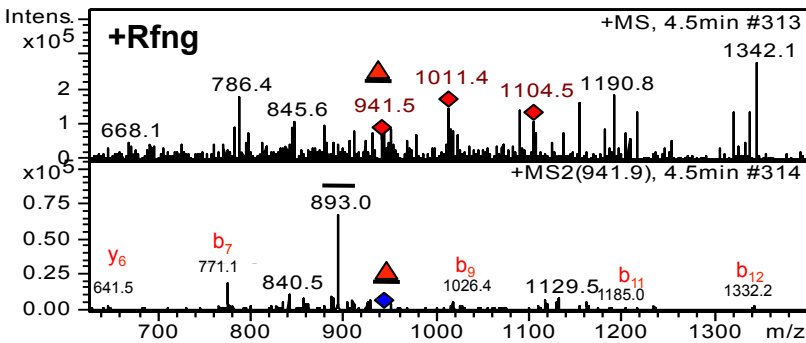

| Glycoform | Predicted Mass (M+3H) <sup>3+</sup> |
|-----------|-------------------------------------|
|           | 893.1                               |
|           | 941.8                               |
|           | 1009.5                              |
|           | 1063.5                              |
|           | 1160.2                              |

# EGF 12

456CISNPCQNDA**T**CLDQIGE473

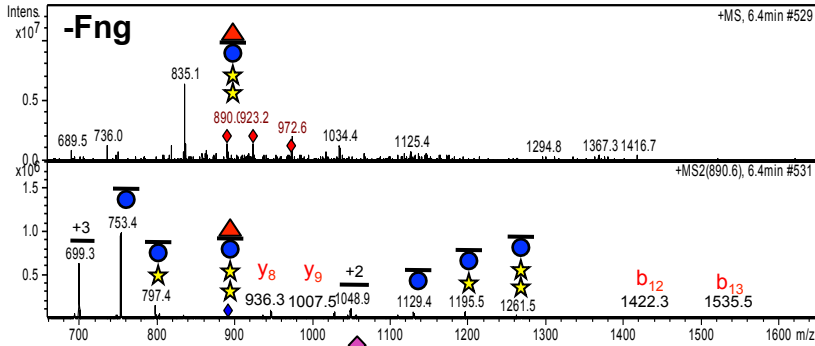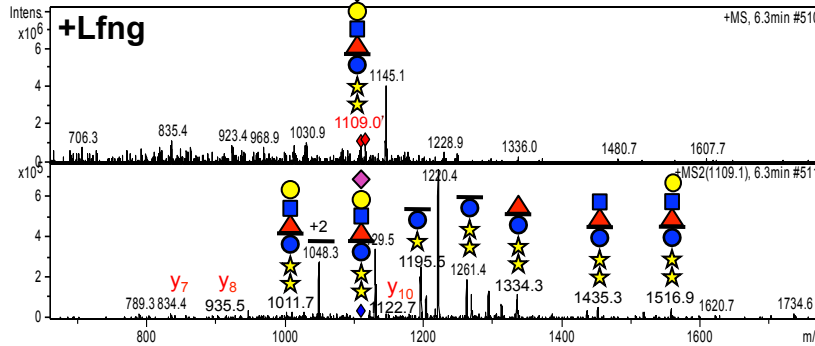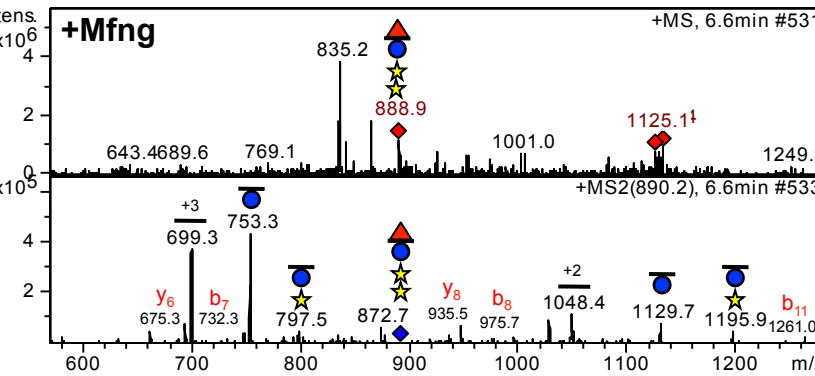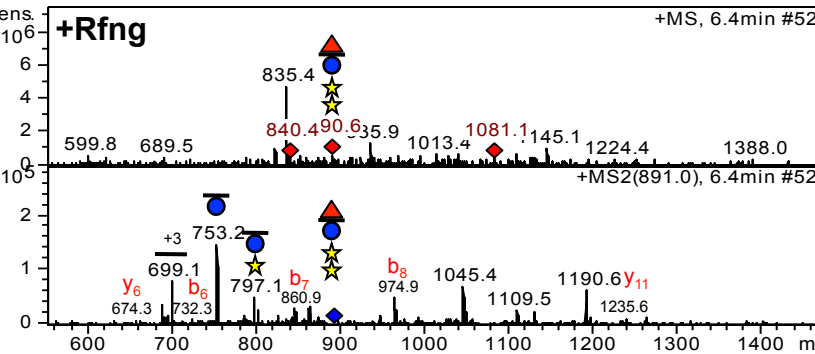

| Glycoform | Predicted Mass (M+3H) <sup>3+</sup> |
|-----------|-------------------------------------|
|           | 699.3                               |
|           | 890.0                               |
|           | 957.7                               |
|           | 1011.7                              |
|           | 1108.8                              |



# EGF16

616GTCQDRDNSYLC627

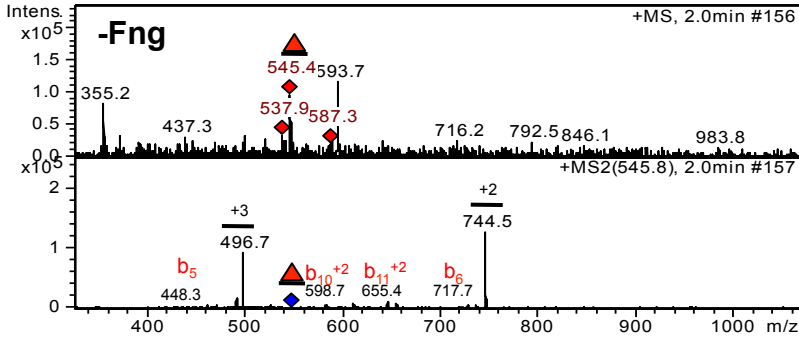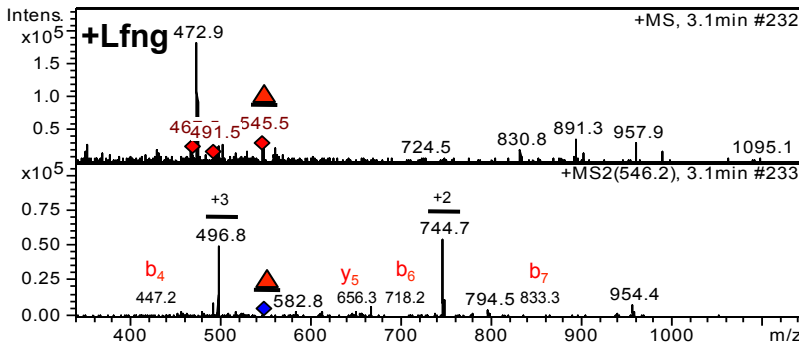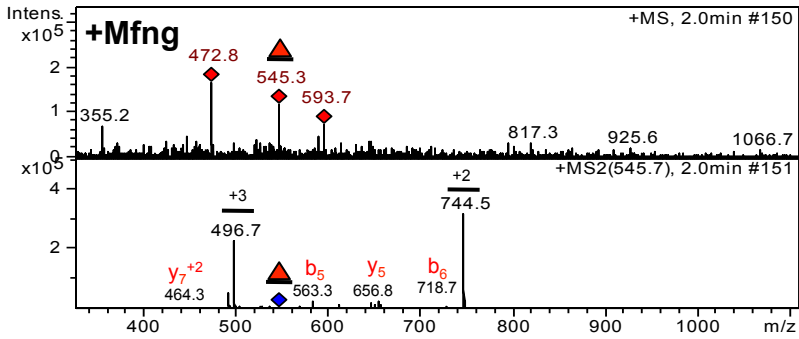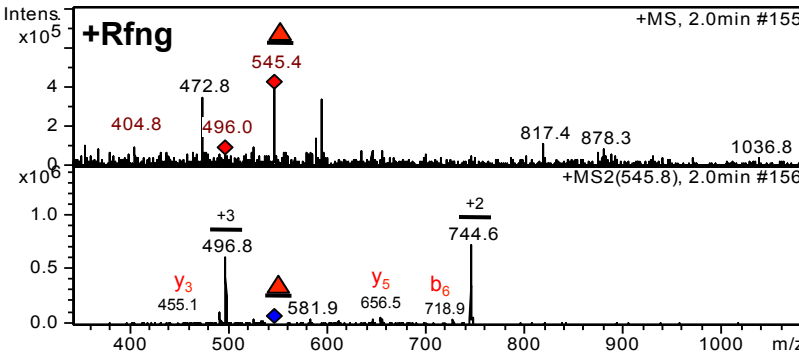

| Glycoform | Predicted Mass (M+3H) <sup>3+</sup> |
|-----------|-------------------------------------|
|           | 496.7                               |
|           | 545.4                               |
|           | 613.1                               |
|           | 667.1                               |
|           | 764.2                               |

# EGF 18

682CAGSPCHNGG**T**CEDGIAGFTCRCPE706

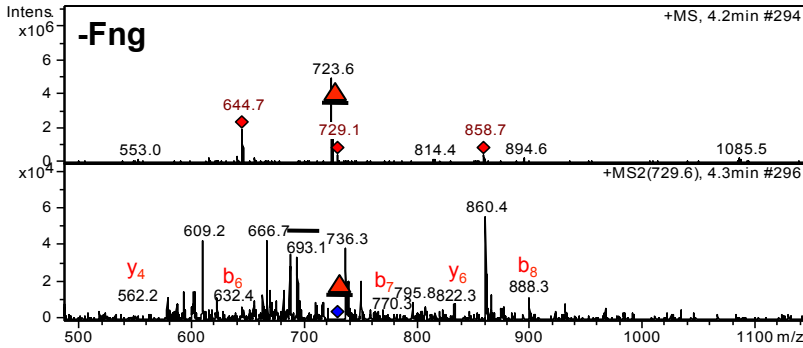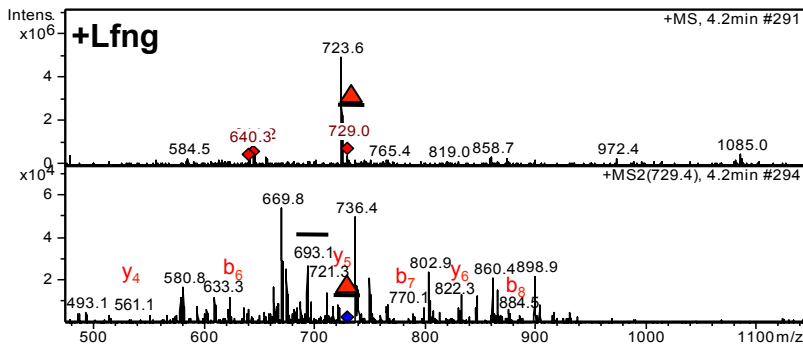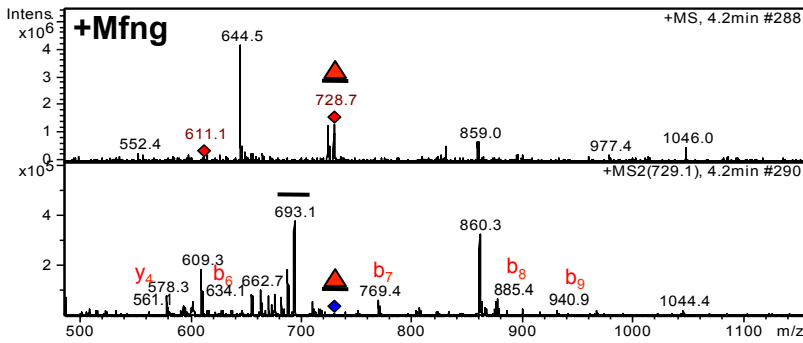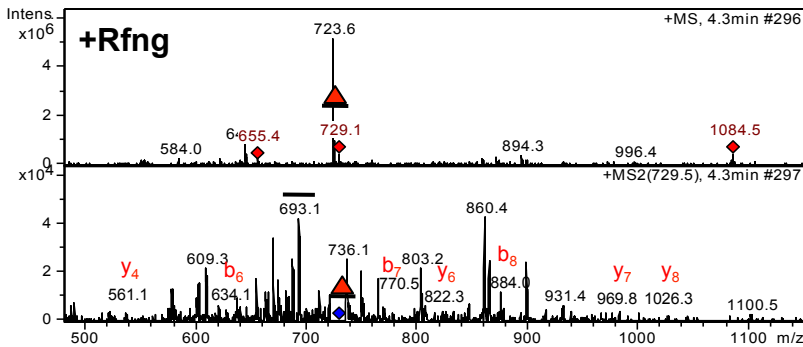

| Glycoform | Predicted Mass (M+4H) <sup>4+</sup> |
|-----------|-------------------------------------|
|           | 693.3                               |
|           | 729.8                               |
|           | 780.6                               |
|           | 821.1                               |
|           | 893.9                               |

# EGF 20

739CDCAPGWSGTNCDINNNECESN**PCV**NGG**T**CK769

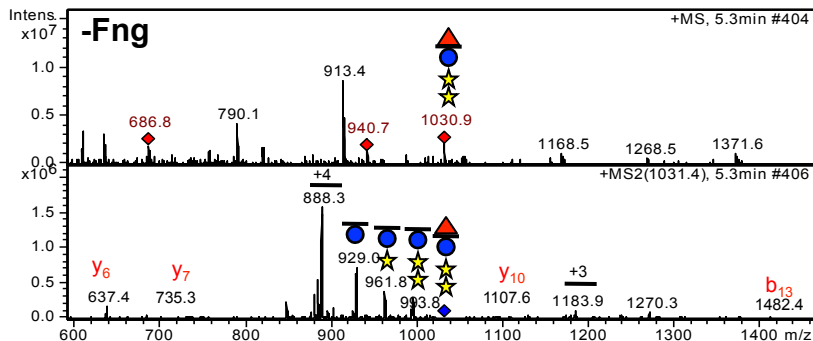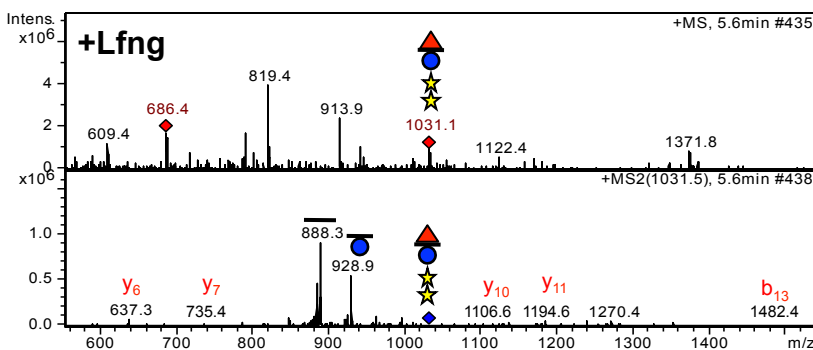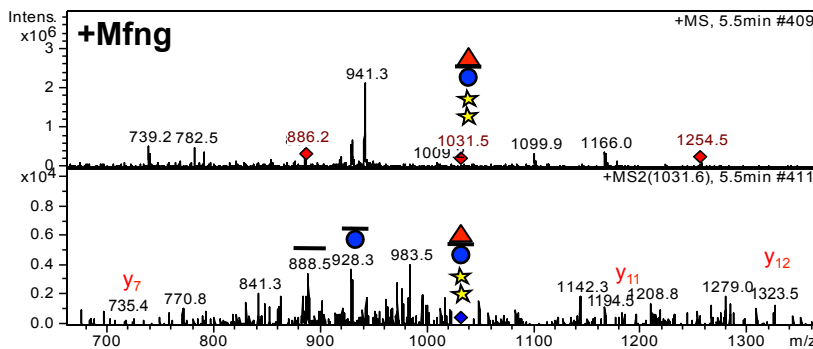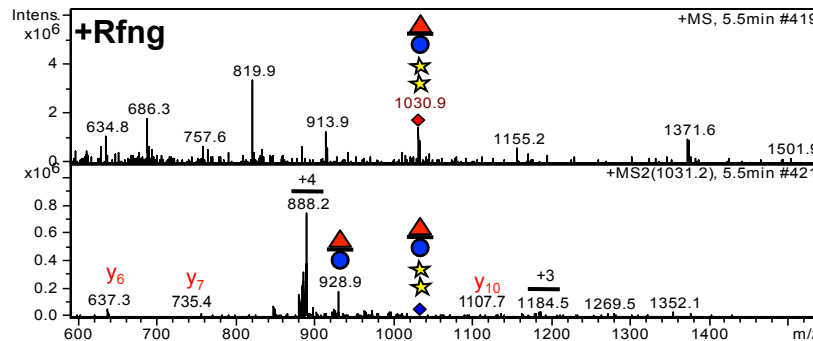

| Glycoform | Predicted Mass (M+4H) <sup>4+</sup> |
|-----------|-------------------------------------|
|           | 888.3                               |
|           | 994.8                               |
|           | 1031.3                              |
|           | 1082.1                              |
|           | 1122.6                              |
|           | 1195.1                              |

# EGF 21

781EGFSGPNCQTNINECASNPCLNQGT**C**IDDVAGYK814

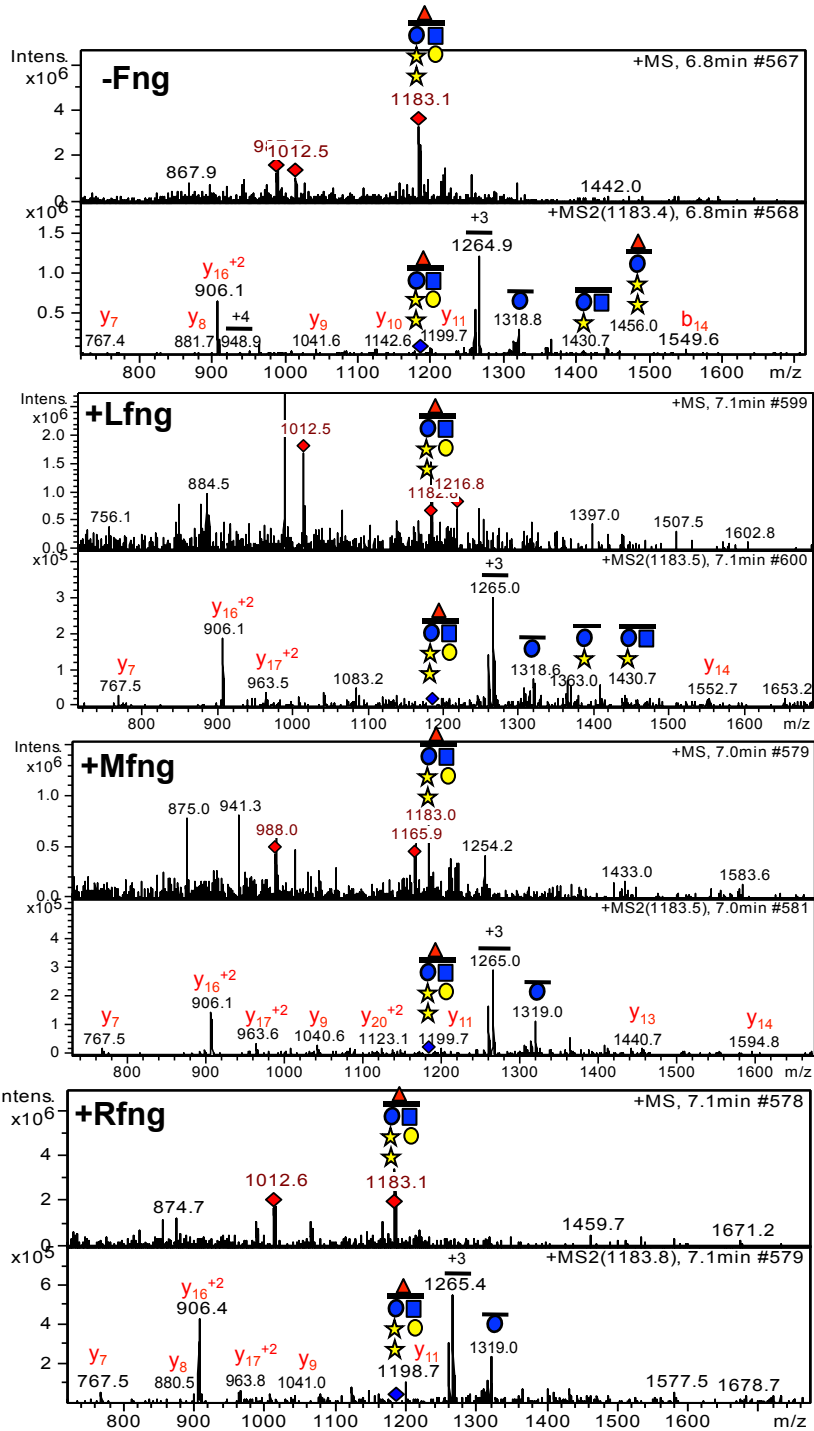

| Glycoform | Predicted Mass (M+4H) <sup>4+</sup> |
|-----------|-------------------------------------|
|           | 948.9                               |
|           | 1091.9                              |
|           | 1150.2                              |
|           | 1183.2                              |

No Fringe-mediated elongation of these three glycoforms of *O*-fucosylated peptide have been detected. Thus, the masses Fringe-modified peptides are omitted from the key here.

# EGF 23

862QGQTCEVDINECVKSPCRHGAS**C**QNTNGSY891

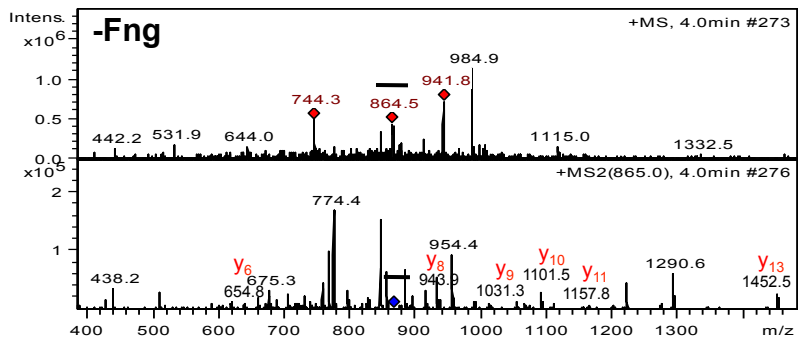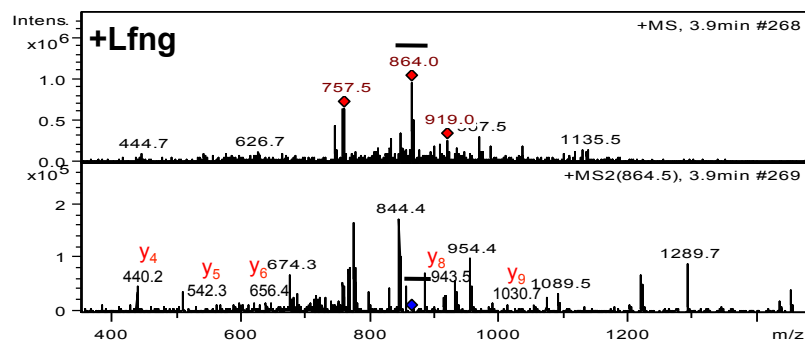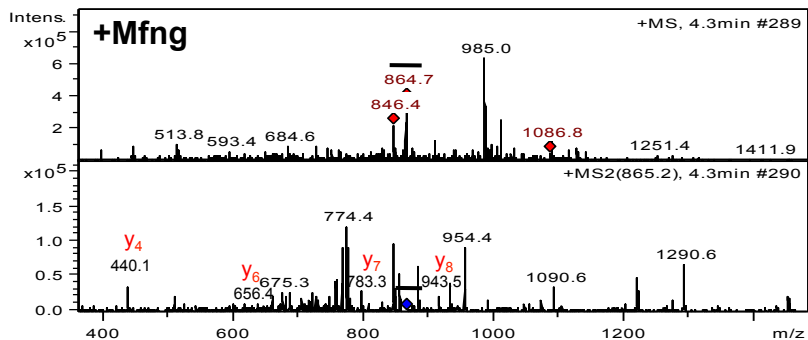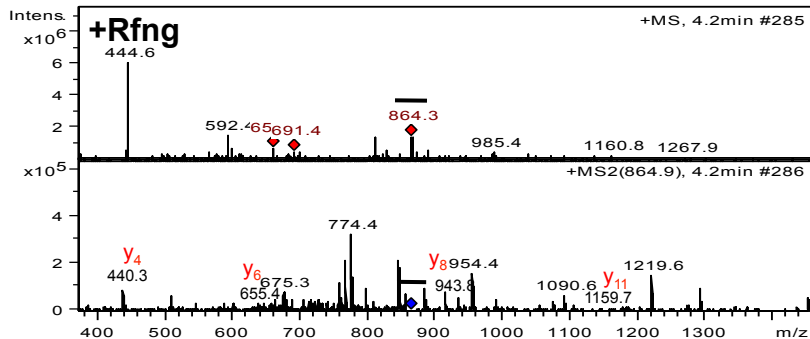

| Glycoform | Predicted Mass (M+4H) <sup>4+</sup> |
|-----------|-------------------------------------|
|           | 865.4                               |
|           | 901.9                               |
|           | 952.7                               |
|           | 993.1                               |
|           | 1065.9                              |

# EGF 24

900TGRNCESDIDDCRPNPCHNGGSCTDGINTAF930

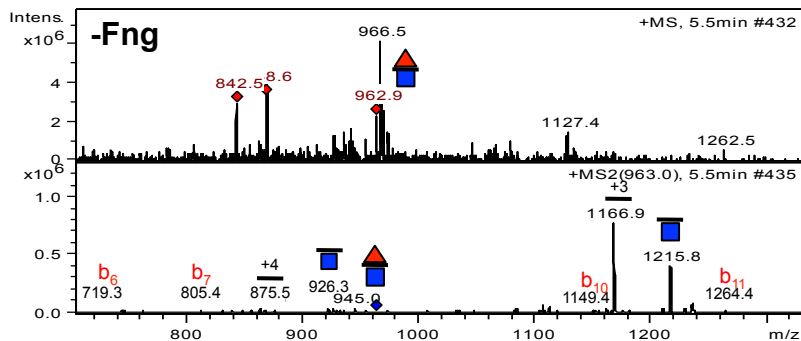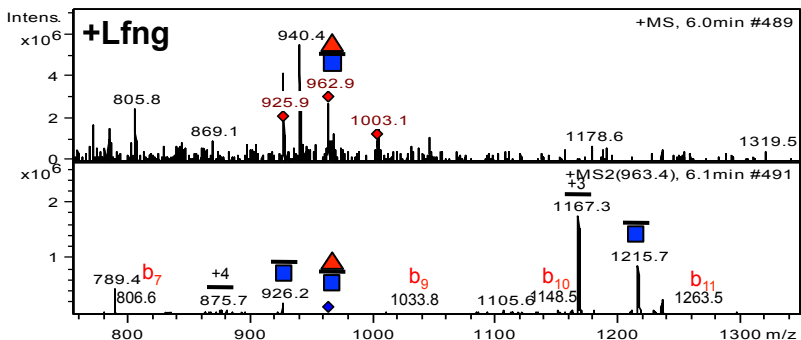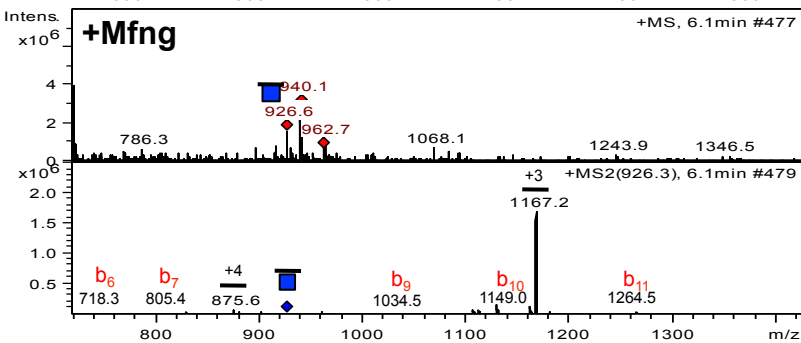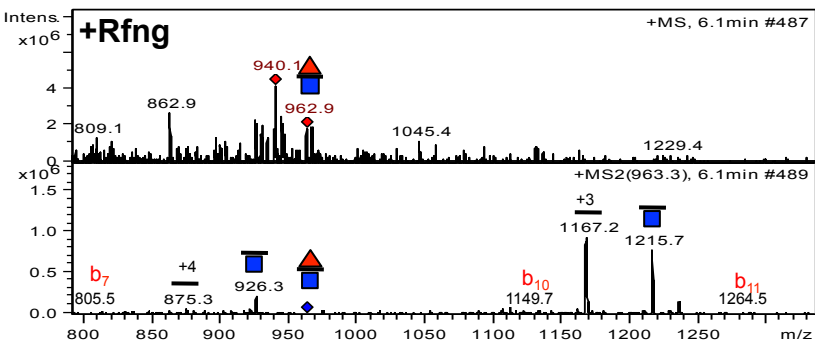

| Glycoform | Predicted Mass (M+4H) <sup>4+</sup> |
|-----------|-------------------------------------|
|           | 875.5                               |
|           | 926.3                               |
|           | 962.8                               |
|           | 1013.6                              |
|           | 1054.1                              |
|           | 1126.6                              |

# EGF 26

994NGGTCVDGINSF1005

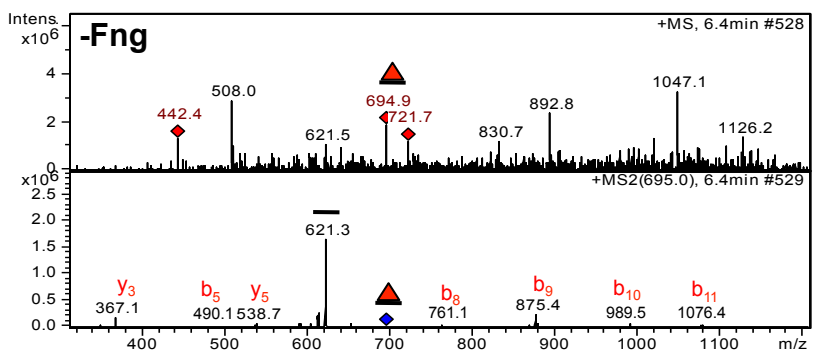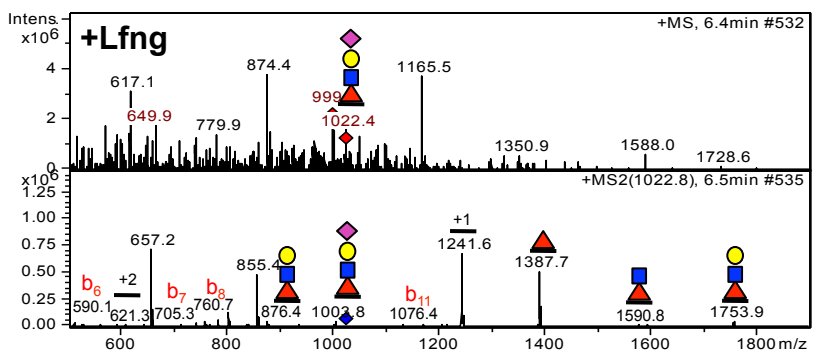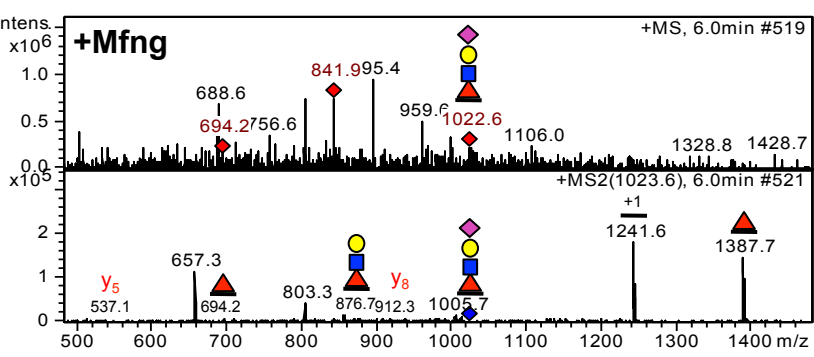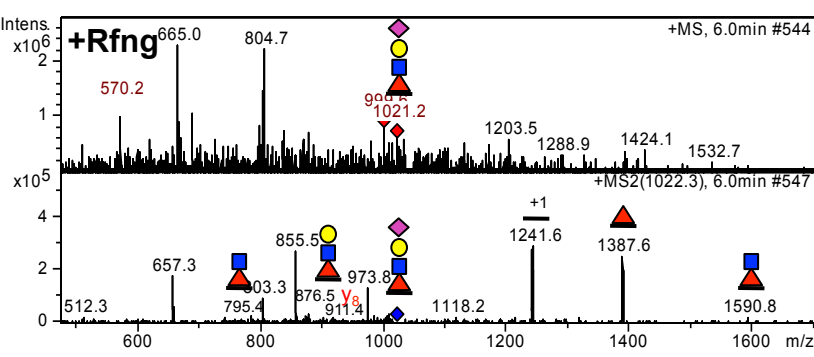

| Glycoform | Predicted Mass (M+2H) <sup>2+</sup> |
|-----------|-------------------------------------|
|           | 621.3                               |
|           | 694.3                               |
|           | 795.8                               |
|           | 876.8                               |
|           | 1022.4                              |

# EGF 27

1021DVNECDSRPCLHGGT**C**QDSY1040  
OH

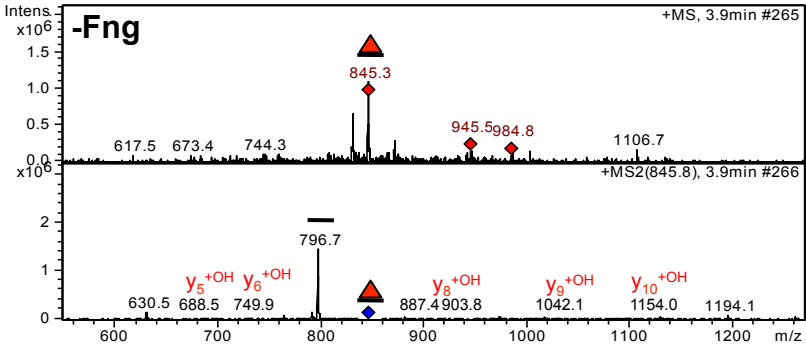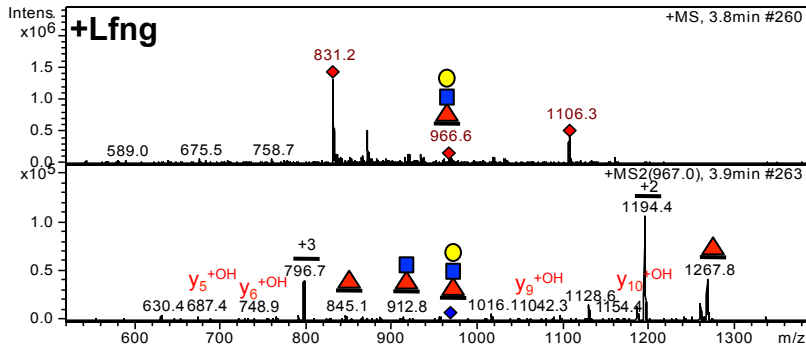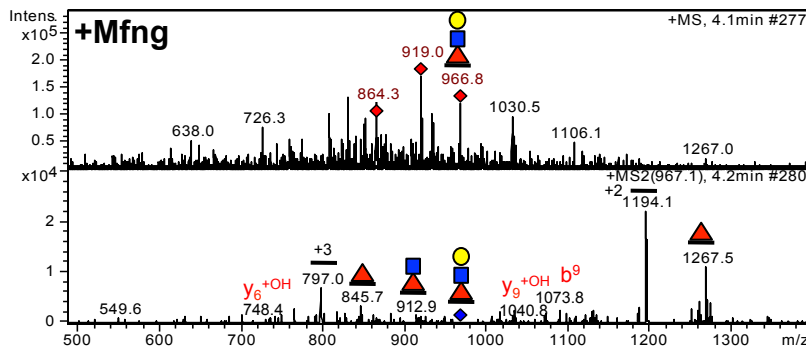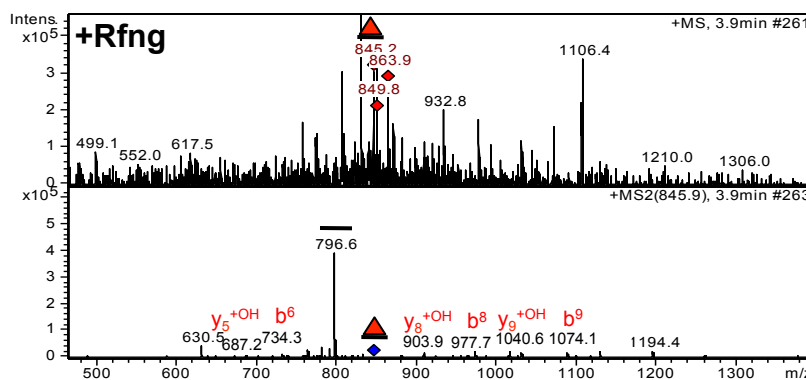

| Glycoform | Predicted Mass (M+3H) <sup>3+</sup> |
|-----------|-------------------------------------|
|           | 796.4                               |
|           | 845.1                               |
|           | 912.8                               |
|           | 966.8                               |
|           | 1063.5                              |



# EGF 30

1142CEDEVDECSPNPCQNGATCTDYL1164  
OH

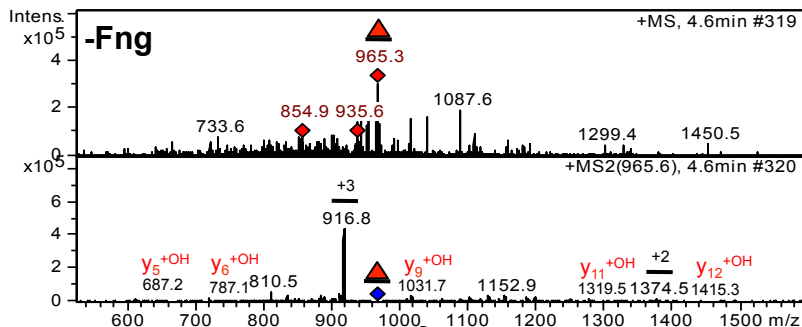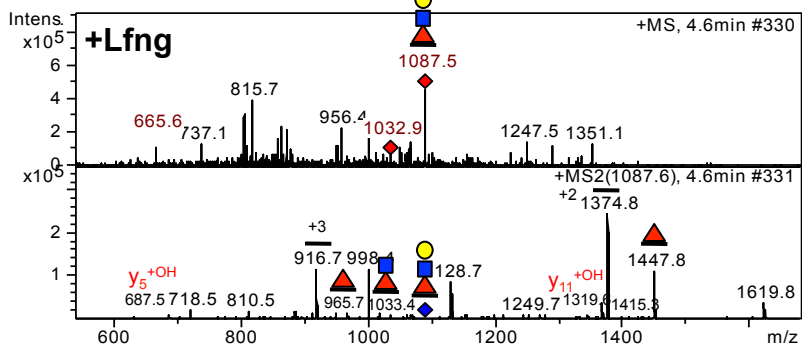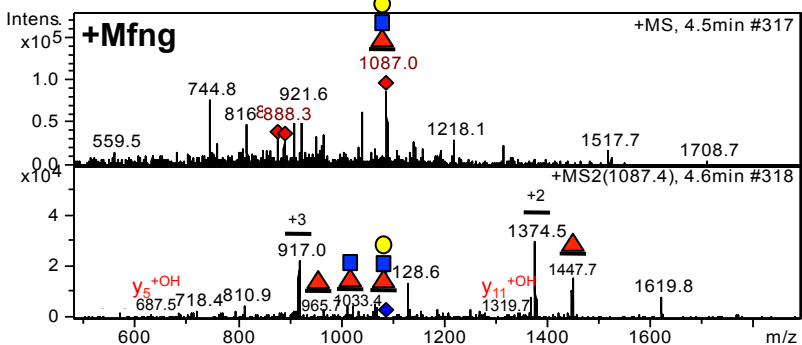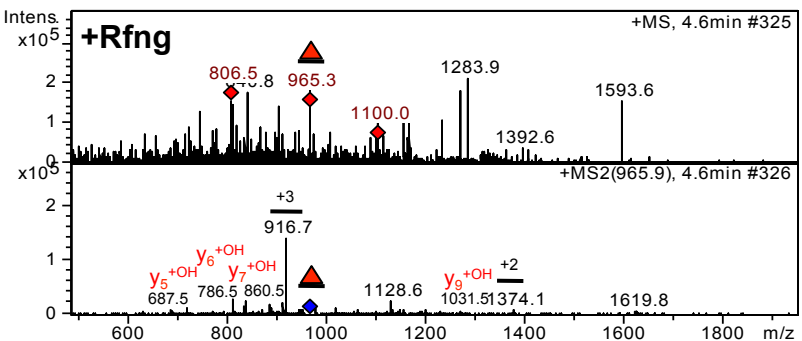

| Glycoform | Predicted Mass (M+3H) <sup>3+</sup> |
|-----------|-------------------------------------|
|           | 917.0                               |
|           | 965.7                               |
|           | 1033.4                              |
|           | 1087.4                              |
|           | 1184.5                              |

# EGF 31

1189SQPCQNGGTCIDL1201

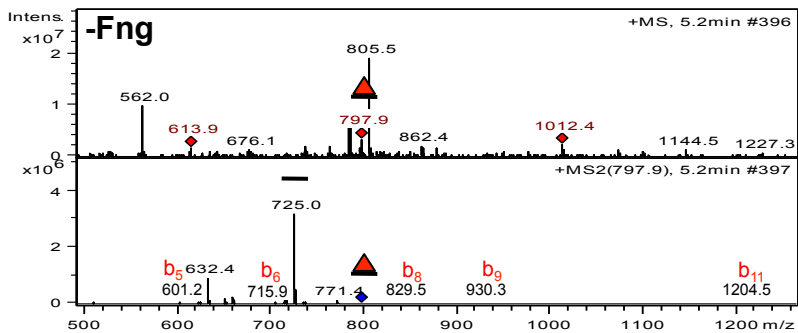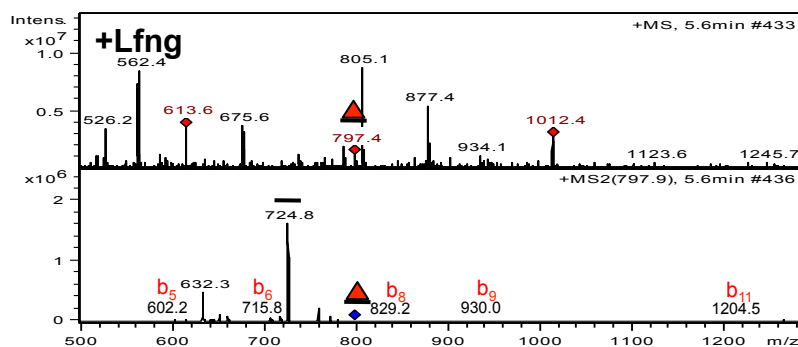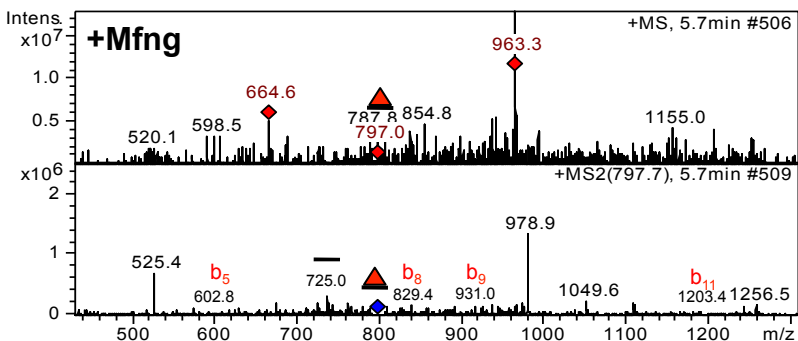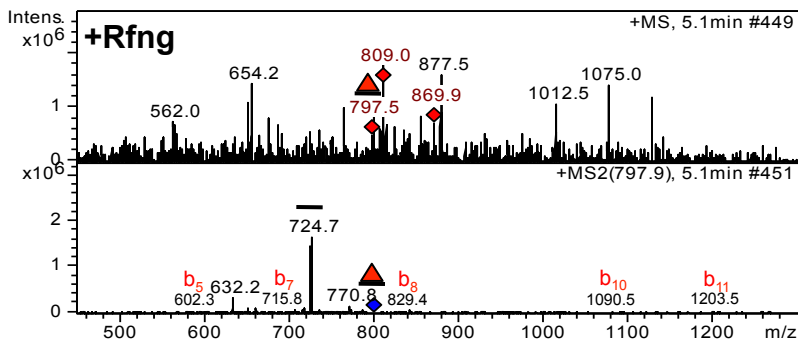

| Glycoform | Predicted Mass (M+2H) <sup>2+</sup> |
|-----------|-------------------------------------|
|           | 725.0                               |
|           | 798.0                               |
|           | 899.6                               |
|           | 980.6                               |
|           | 1126.2                              |

# EGF 32

1238CFNNGT**T**CVDQVGGYTCTCPPGFVGER1263

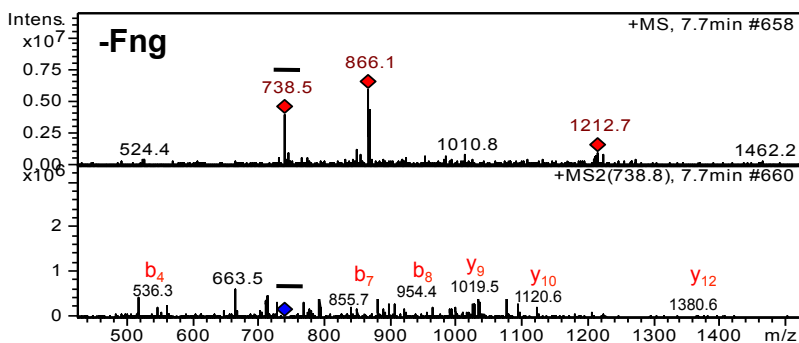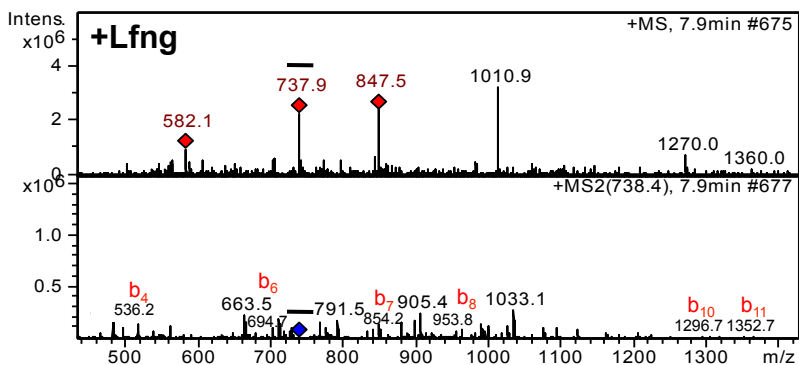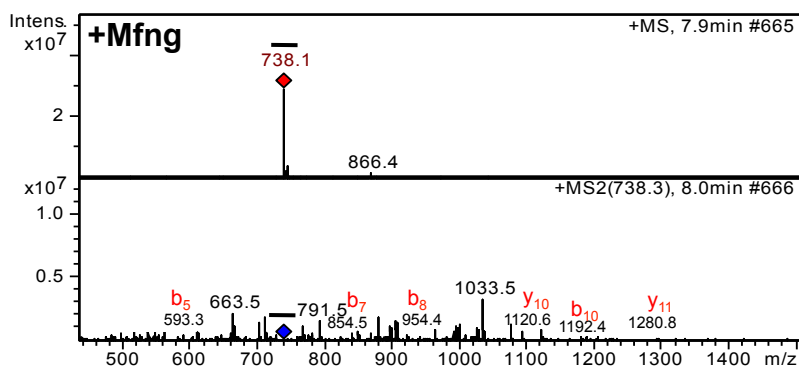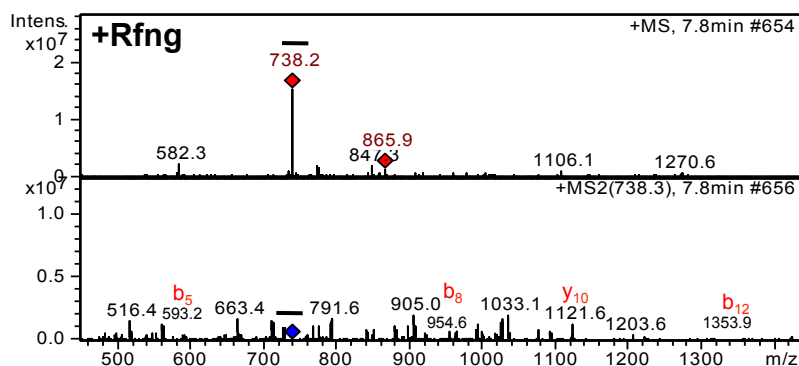

| Glycoform | Predicted Mass (M+4H) <sup>4+</sup> |
|-----------|-------------------------------------|
|           | 738.5                               |
|           | 775.0                               |
|           | 825.8                               |
|           | 866.2                               |
|           | 939.0                               |

# EGF 35

1357CLNGGTCISGPR1368

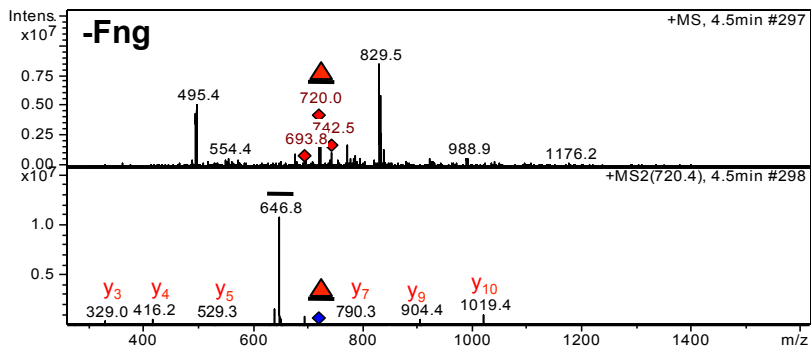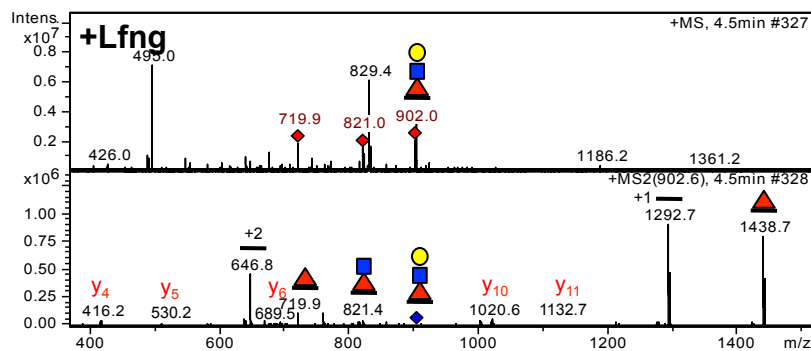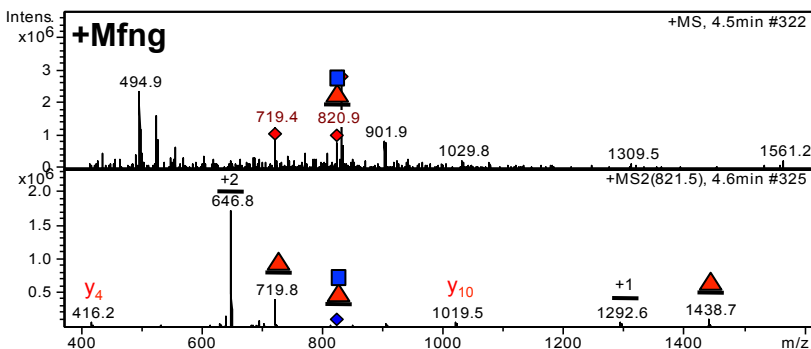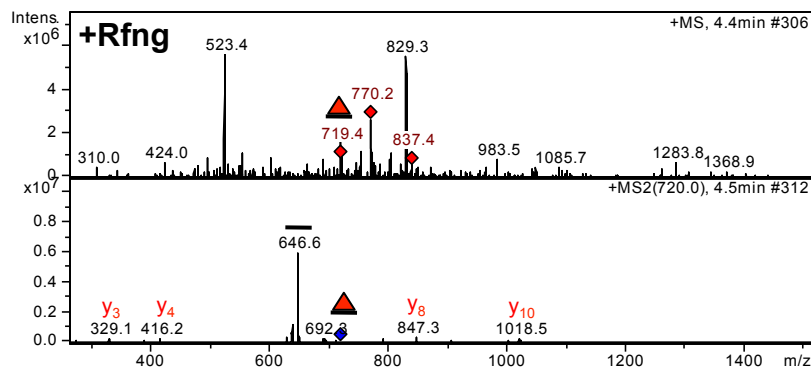

| Glycoform | Predicted Mass (M+2H) <sup>2+</sup> |
|-----------|-------------------------------------|
|           | 646.8                               |
|           | 719.8                               |
|           | 821.4                               |
|           | 902.4                               |
|           | 1048.0                              |

# EGF36

<sup>1369</sup>SPTCLCLGSFTGPEQCQFPASSPCVGSNP  
CYNQGTCEPTSENPFYR<sup>1413</sup>

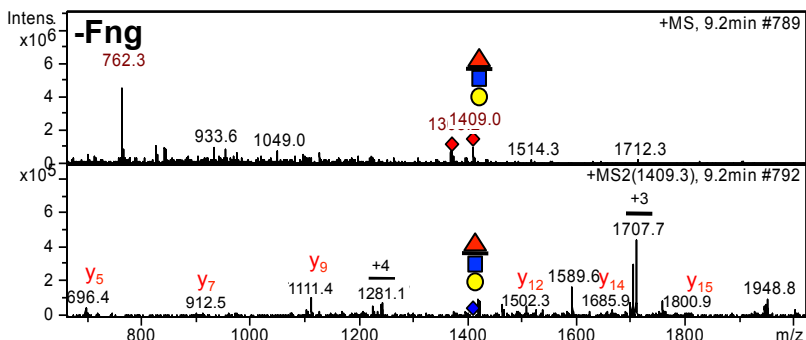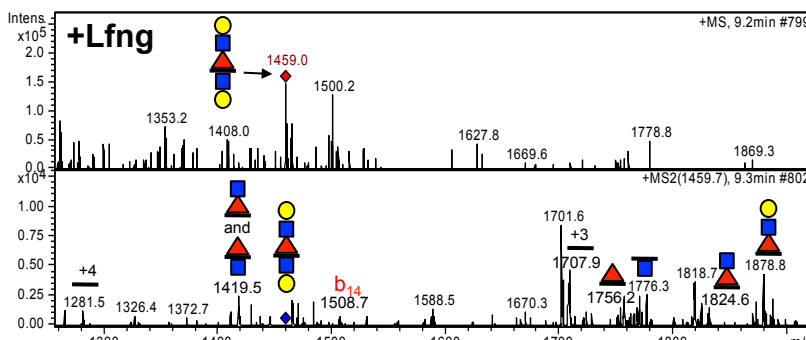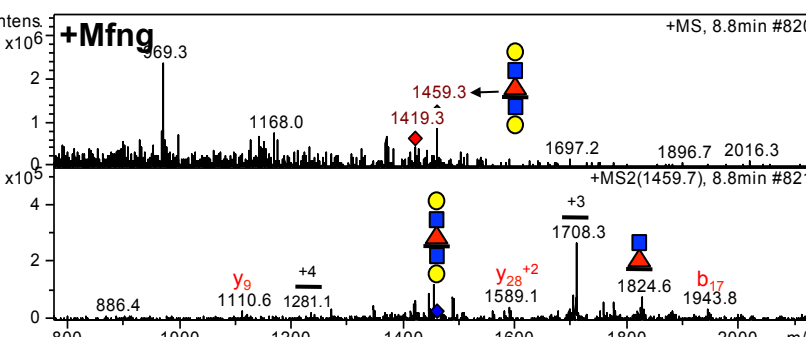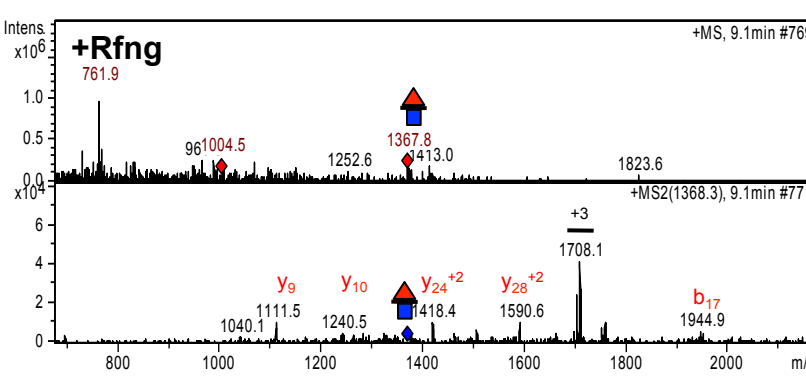

| Glycoform | Predicted Mass (M+4H) <sup>4+</sup> |
|-----------|-------------------------------------|
|           | 1281.1                              |
|           | 1368.4                              |
|           | 1408.9                              |
|           | 1419.2                              |
|           | 1459.7                              |
|           | 1500.2                              |
|           | 1573.0                              |
